# Supplementary material
Source: publisher figshare collection journal article supplement (https://frontiersin.figshare.com/ndownloader/files/14765555)
Supplement: Supplementary file [file 14765555]

Tab. S3 Phylogenetic classification of genera within the different subgroups of the *Rhodobacteraceae*.

| <i>Rhodobacter</i> group                        | <i>Rhodovulum</i> group | <i>Amaricoccus</i> group   | <i>Paracoccus</i> group                   | <i>Stappia</i> group      | <i>Roseobacter</i> group    |                                          |                                                   |
|-------------------------------------------------|-------------------------|----------------------------|-------------------------------------------|---------------------------|-----------------------------|------------------------------------------|---------------------------------------------------|
| 25 genera                                       | 3 genera                | 8 genera                   | 3 genera                                  | 11 genera                 | 126 genera                  |                                          |                                                   |
| <i>Albirhodobacter</i>                          | <i>Albidovulum</i>      | <i>Albimonas</i>           | <i>Methylarcula</i>                       | <i>Acuticoccus</i>        | <i>Actibacterium</i>        | <i>Marimonas</i>                         | <i>Pseudoroseicyclus</i>                          |
| <i>Cereibacter</i>                              | <i>Jhaorihella</i>      | <i>Amaricoccus</i>         | <i>Paracoccus</i> (= <i>Thiosphaera</i> ) | <i>Agaricola</i>          | <i>Aestuariibius</i>        | <i>Marinibacterium</i>                   | <i>'Pseudoroseobacter'</i> *                      |
| <i>Confluentimicrobium</i>                      | <i>Rhodovulum</i>       | <i>Halovulum</i>           | <i>Piezobacter</i>                        | <i>Ahrensia</i>           | <i>Aestuariicoccus</i>      | <i>'Marinosulfonomonas'</i>              | <i>Pseudoroseovarius</i>                          |
| <i>Defluviimonas</i>                            |                         | <i>Limibaculum</i>         |                                           | <i>Labrenzia</i>          | <i>Aestuariahabitans</i>    | <i>Marinovum</i>                         | <i>Pseudoruegeria</i>                             |
| <i>Falsirhodobacter</i>                         |                         | <i>Oceanicella</i>         |                                           | <i>Nesiotobacter</i>      | <i>Aestuariivita</i>        | <i>Maritimibacter</i>                    | <i>Pseudoseohaecicola</i>                         |
| <i>Frigidibacter</i>                            |                         | <i>Pleomorphobacterium</i> |                                           | <i>Pannonibacter</i>      | <i>Aliiroseovarius</i>      | <i>Marivita</i> (= <i>Gaetbulicola</i> ) | <i>Psychromarinibacter</i> *                      |
| <i>Gemmobacter</i> (= <i>Catellibacterium</i> ) |                         | <i>Rubribacterium</i>      |                                           | <i>Polymorphum</i>        | <i>Aliisedimentitalea</i>   | <i>Marivivens</i>                        | <i>Puniceibacterium</i>                           |
| <i>Haematobacter</i>                            |                         | <i>Rubrimonas</i>          |                                           | <i>Pseudovibrio</i>       | <i>Alkalimicrobium</i>      | <i>Monaibacterium</i>                    | <i>Rhodosalinus</i>                               |
| <i>Halodurantiibacterium</i>                    |                         |                            |                                           | <i>Rhodothermalassium</i> | <i>Amylibacter</i>          | <i>Nautella</i>                          | <i>Roseibacterium</i>                             |
| <i>'Natronohydrobacter'</i>                     |                         |                            |                                           | <i>Roseibium</i>          | <i>'Antarcticicola'</i> *   | <i>Neptunicoccus</i>                     | <i>Roseicyclus</i>                                |
| <i>Paenirhodobacter</i>                         |                         |                            |                                           | <i>Stappia</i>            | <i>Antarctobacter</i>       | <i>Nereida</i>                           | <i>Roseisalinus</i>                               |
| <i>Pararhodobacter</i>                          |                         |                            |                                           |                           | <i>Aquicoccus</i>           | <i>Nioella</i>                           | <i>Roseivivax</i>                                 |
| <i>Plastorhodobacter</i>                        |                         |                            |                                           |                           | <i>Aquimixicola</i>         | <i>Oceanibulbus</i>                      | <i>Roseobacter</i>                                |
| <i>Pseudorhodobacter</i>                        |                         |                            |                                           |                           | <i>Ascidiaaceihabitans</i>  | <i>Oceanicola</i>                        | <i>Roseovarius</i>                                |
| <i>Rhodobaca</i>                                |                         |                            |                                           |                           | <i>Boseongicola</i>         | <i>Oceaniglobus</i>                      | <i>Rubellimicrobium</i>                           |
| <i>Rhodobacter</i>                              |                         |                            |                                           |                           | <i>Brevirhabdus</i>         | <i>Oceaniovalibus</i>                    | <i>Rubricella</i>                                 |
| <i>Rhodobaculum</i>                             |                         |                            |                                           |                           | <i>Celeribacter</i>         | <i>'Oceanobacterium'</i> *               | <i>Ruegeria</i> (= <i>Silicibacter</i> )          |
| <i>Roseibaca</i>                                |                         |                            |                                           |                           | <i>Citricella</i>           | <i>Octadecabacter</i>                    | <i>Sagittula</i>                                  |
| <i>Roseibacula</i>                              |                         |                            |                                           |                           | <i>Citreimonas</i>          | <i>Pacificibacter</i>                    | <i>Salinhabitans</i>                              |
| <i>Roseicitreum</i>                             |                         |                            |                                           |                           | <i>Cribrihabitans</i>       | <i>Palleronia</i>                        | <i>Salinovum</i>                                  |
| <i>Roseinatronobacter</i>                       |                         |                            |                                           |                           | <i>Dinoroseobacter</i>      | <i>Paradonghicola</i>                    | <i>Salipiger</i>                                  |
| <i>Sinorhodobacter</i>                          |                         |                            |                                           |                           | <i>Donghicola</i>           | <i>Paraphaeobacter</i>                   | <i>Sedimentitalea</i>                             |
| <i>Tabrizicola</i>                              |                         |                            |                                           |                           | <i>Epibacterium</i>         | <i>Pelagibaca</i>                        | <i>Sediminimonas</i>                              |
| <i>'Tetracoccus'</i>                            |                         |                            |                                           |                           | <i>Halocynthiibacter</i>    | <i>Pelagicola</i>                        | <i>Seohaecicola</i>                               |
| <i>Thioclava</i>                                |                         |                            |                                           |                           | <i>Haslibacter</i>          | <i>Pelagimonas</i>                       | <i>Shimia</i>                                     |
|                                                 |                         |                            |                                           |                           | <i>Huaishua</i>             | <i>Phaeobacter</i>                       | <i>Silicimonas</i>                                |
|                                                 |                         |                            |                                           |                           | <i>Hwanghaecicola</i>       | <i>Planktomarina</i>                     | <i>Sulfitobacter</i> (= <i>Staleya</i> )          |
|                                                 |                         |                            |                                           |                           | <i>Jannaschia</i>           | <i>Planktotalea</i>                      | <i>Tateyamaia</i>                                 |
|                                                 |                         |                            |                                           |                           | <i>Jindonia</i>             | <i>Pontibaca</i>                         | <i>Thalassobacter</i>                             |
|                                                 |                         |                            |                                           |                           | <i>Ketogulonicigenium</i>   | <i>Ponticoccus</i>                       | <i>'Thalassobium'</i> *                           |
|                                                 |                         |                            |                                           |                           | <i>Lacimonas</i>            | <i>Pontivivens</i>                       | <i>Thalassobius</i>                               |
|                                                 |                         |                            |                                           |                           | <i>Leisingera</i>           | <i>Poseidonocella</i>                    | <i>Thalassococcus</i>                             |
|                                                 |                         |                            |                                           |                           | <i>Lentibacter</i>          | <i>Primorskyibacter</i>                  | <i>Thiobacimonas</i>                              |
|                                                 |                         |                            |                                           |                           | <i>Litoreibacter</i>        | <i>Profundibacterium</i>                 | <i>Tranquillimonas</i>                            |
|                                                 |                         |                            |                                           |                           | <i>Litorimicrobium</i>      | <i>Pseudodonghicola</i>                  | <i>Tritonibacter</i>                              |
|                                                 |                         |                            |                                           |                           | <i>Litorisediminicola</i>   | <i>Pseudohalocynthiibacter</i>           | <i>Tropicibacter</i> (= <i>Phaeomarinomonas</i> ) |
|                                                 |                         |                            |                                           |                           | <i>Litorisediminivivens</i> | <i>Pseudomaribius</i>                    | <i>Tropicimonas</i>                               |
|                                                 |                         |                            |                                           |                           | <i>Loktanella</i>           | <i>'Pseudomarivita'</i> *                | <i>Vadicella</i>                                  |
|                                                 |                         |                            |                                           |                           | <i>Lutimaribacter</i>       | <i>Pseudooceanicola</i>                  | <i>Wenxinia</i>                                   |
|                                                 |                         |                            |                                           |                           | <i>Maliponia</i>            | <i>Pseudooctadecabacter</i>              | <i>Xuhuaishua</i>                                 |
|                                                 |                         |                            |                                           |                           | <i>Mameliella</i>           | <i>Pseudopelagicola</i>                  | <i>Yangia</i>                                     |
|                                                 |                         |                            |                                           |                           | <i>Maribius</i>             | <i>Pseudophaeobacter</i>                 | <i>Youngimonas</i>                                |

'genus not validly published', \*classification in subgroup not clear
